# Supplementary material for: Unprecedented ipso aromatic nucleophilic substitution upon oxidative decarboxylation of tris(p-carboxyltetrathiaaryl)methyl (TAM) radicals: a new access to diversely substituted TAM radicals
Source: Royal Society of Chemistry journal article supplement (doi:10.1039/c1cc10426h), 2011-01-01
Supplement: c1cc10426h.pdf [file c1cc10426h.pdf]

## ELECTRONIC SUPPLEMENTARY INFORMATION (ESI)

### Unprecedented *Ipso* Aromatic Nucleophilic Substitution Upon Oxidative Decarboxylation of Tris-(*p*-carboxyltetrahydraaryl)methyl (TAM) Radicals: A New Access to Diversely Substituted TAM Radicals

Christophe Decroos,<sup>a</sup> Thierry Prangé,<sup>b</sup> Daniel Mansuy,<sup>a</sup> Jean-Luc Boucher,<sup>a</sup> and Yun Li,<sup>\*a</sup>

<sup>a</sup>*Laboratoire de Chimie et Biochimie Pharmacologiques et Toxicologiques, Université Paris Descartes, UMR 8601 CNRS, 45 Rue des Saints Pères, 75270 Paris cedex 06, France.*

<sup>b</sup>*Laboratoire de Cristallographie et RMN Biologiques, Université Paris Descartes, UMR 8015 CNRS, 4 Av de l'Observatoire, 75270 Paris cedex 06, France.*

### Experimental Section

**General procedure for TAM-Nu (4-7) synthesis:** To a solution of TAM **1** in distilled water (~ 1 mL per mg of TAM **1**) under magnetic stirring was added 2 equiv. of K<sub>2</sub>Ir(IV)Cl<sub>6</sub> (20 mM solution freshly prepared from distilled water). After 1 min at room temperature, 50 equiv. of nucleophile were added to the reaction mixture. If not soluble in water, the nucleophile was dissolved in a minimum of an organic solvent such as THF or methanol. When *N*-acetylcysteine methyl ester was used as a nucleophile, NaOH (50 equiv. of a 0.1 M solution) was mixed with the thiol before adding to TAM **1**<sup>+</sup>. After 10 min at room temperature, the mixture was analyzed by HPLC-MS. Solvents were removed and products were purified by semi-preparative HPLC with a reversed-phase Hypersil ODS column (250 × 7.8 mm) and a water / acetonitrile gradient was used.

Radical **11** was synthesized according to the same procedure (50 equiv. NaNO<sub>2</sub>) except for the use of 12 equiv. of K<sub>2</sub>Ir(IV)Cl<sub>6</sub>. Product was purified by precipitation and isolated in a 74% yield. Slow diffusion of pentane into a solution of **11** in chloroform at room temperature for about 2 weeks allowed the isolation of single crystals suitable for X-ray diffraction.<sup>[15]</sup>

Table S1. ESI-HRMS molecular ion of TAM-Nu **4**, **5**, **6**, **7** and **11**

| TAM-Nu    | ESI-HRMS                                                                                                           |
|-----------|--------------------------------------------------------------------------------------------------------------------|
| <b>4</b>  | 1156.1316 (calculated for C <sub>51</sub> H <sub>65</sub> O <sub>4</sub> PS <sub>12</sub> 1156.1269)               |
| <b>5</b>  | 1071.9973 (calculated for C <sub>46</sub> H <sub>44</sub> N <sub>2</sub> O <sub>4</sub> S <sub>12</sub> 1071.9950) |
| <b>6</b>  | 1038.0272 (calculated for C <sub>44</sub> H <sub>48</sub> NO <sub>4</sub> S <sub>12</sub> 1038.0232)               |
| <b>7</b>  | 1152.9716 (calculated for C <sub>45</sub> H <sub>48</sub> NO <sub>7</sub> NaS <sub>13</sub> 1152.9698)             |
| <b>11</b> | 1001.9272 (calculated for C <sub>37</sub> H <sub>36</sub> N <sub>3</sub> O <sub>6</sub> S <sub>12</sub> 1001.9253) |

## EPR spectroscopy

EPR spectra were recorded at 20°C using a Bruker Elexsys 500 EPR spectrometer operating at X-band (9.85 GHz) with a SHQ cavity and an AquaX quartz cell, under the following conditions: modulation frequency, 100 kHz; modulation amplitude, 0.1 G; time constant, 40.96 ms; conversion time, 40.96 ms; and microwave power, 1 mW.

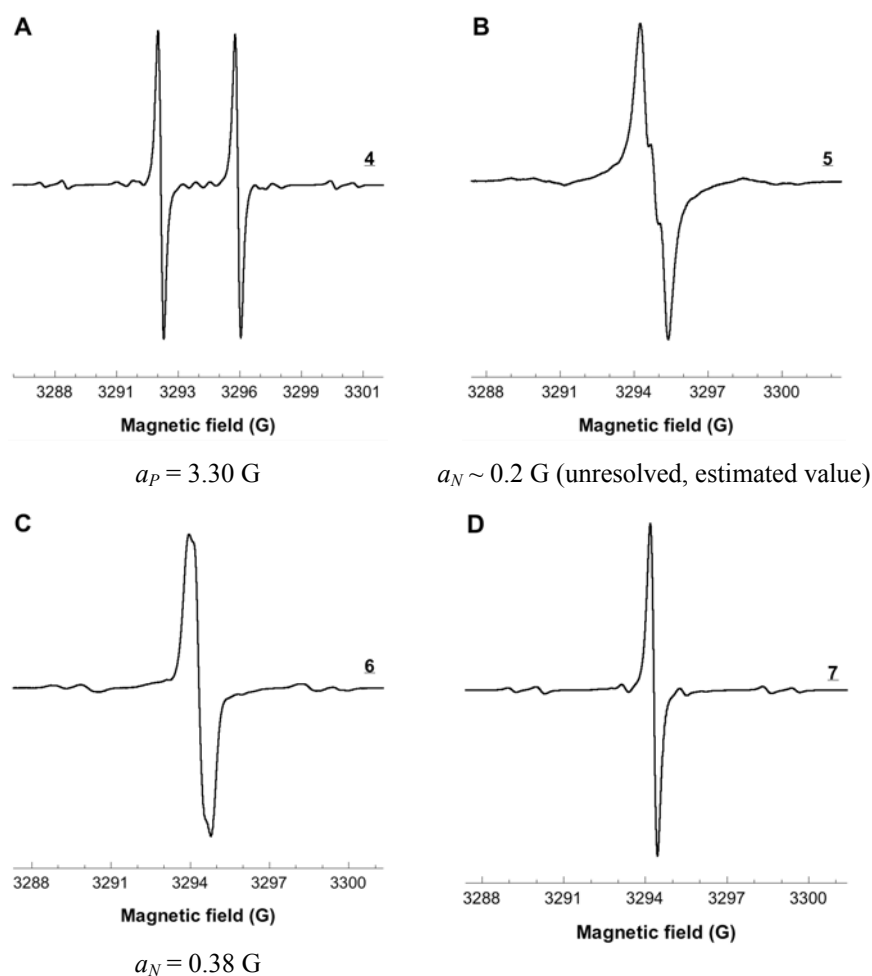

Figure S1. EPR spectra of TAM-Nu **4** (A), **5** (B), **5** (C), and **7** (D) (in degassed MeOH)

## UV-Visible Spectroscopy

UV-Visible spectra were recorded at room temperature on a Cary 300 spectrophotometer (Varian, Les Ulis, France).

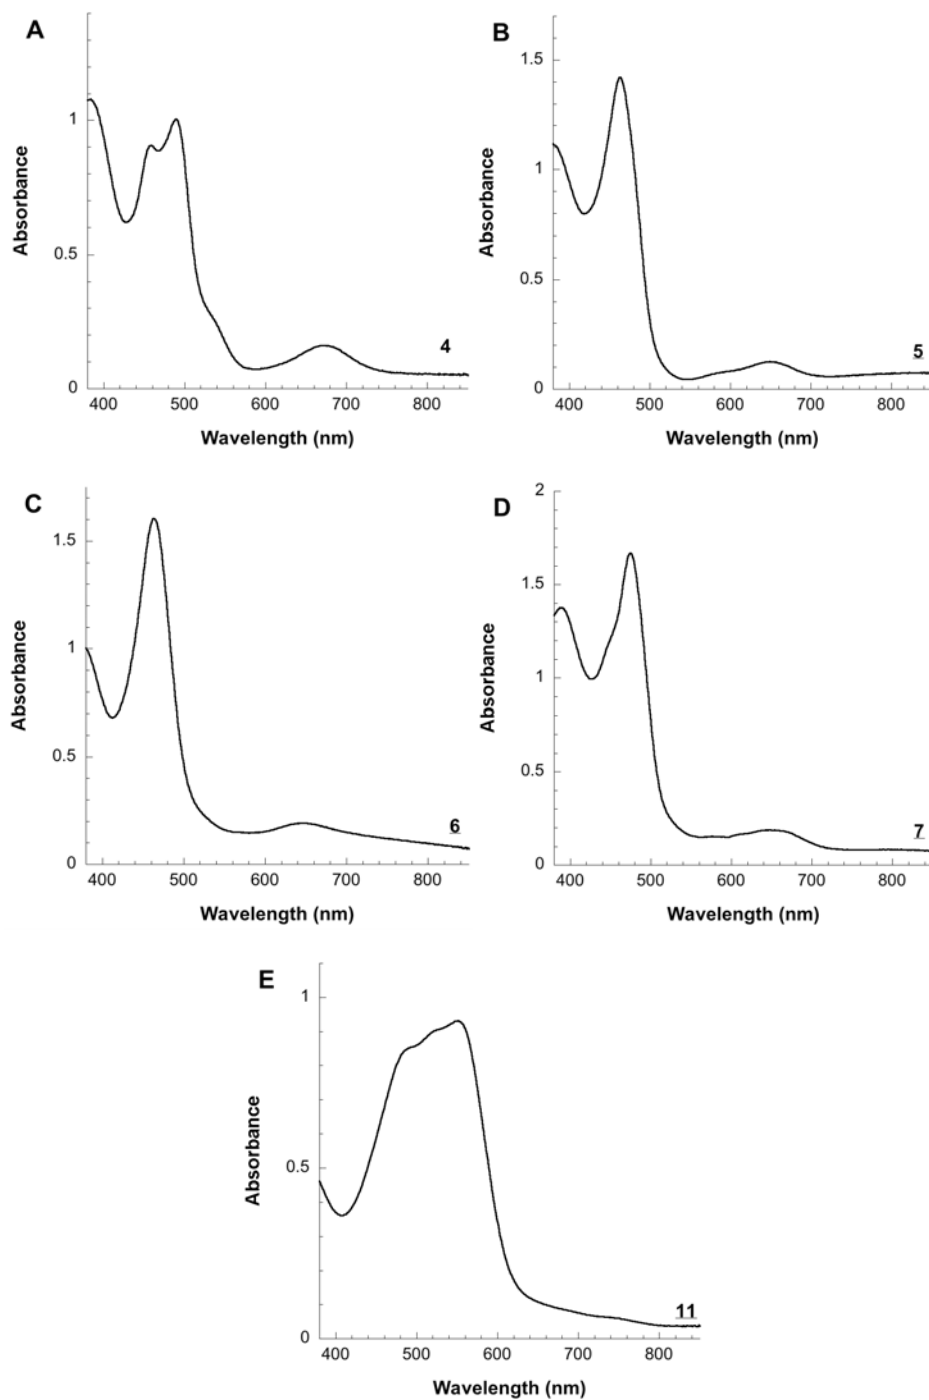

Figure S2. UV-Visible spectra of TAM-Nu **4** (A), **5** (B), **6** (C), **7** (D), and **11** (E) (in MeOH except for **11**: in CH<sub>2</sub>Cl<sub>2</sub>)

Table S2. Absorption maxima of the UV-visible spectra of TAM-Nu 4-7, 11 and 16-20 in the visible region

| TAM-Nu    | $\lambda_{\text{max}}$ (nm)      | TAM-Nu   | $\lambda_{\text{max}}$ (nm) |
|-----------|----------------------------------|----------|-----------------------------|
| <b>4</b>  | 459, 490, and 671 <sup>[a]</sup> | <b>5</b> | 463 and 648 <sup>[a]</sup>  |
| <b>6</b>  | 463 and 648 <sup>[a]</sup>       | <b>7</b> | 475 and 643 <sup>[a]</sup>  |
| <b>11</b> | 494, 525, and 548 <sup>[b]</sup> |          |                             |

<sup>[a]</sup> in MeOH; <sup>[b]</sup> in CH<sub>2</sub>Cl<sub>2</sub>.

Table S3. Crystallographic data for **11**.

|                                                        |                                                                                                            |
|--------------------------------------------------------|------------------------------------------------------------------------------------------------------------|
| Chemical formula                                       | C <sub>37</sub> H <sub>36</sub> N <sub>3</sub> O <sub>6</sub> S <sub>12</sub>                              |
| Formula weight                                         | 1003.53                                                                                                    |
| Temperature (K)                                        | 110 (2)                                                                                                    |
| Wavelength (Å)                                         | 0.92770                                                                                                    |
| Crystal system                                         | monoclinic                                                                                                 |
| Space group                                            | P2 <sub>1</sub> /n                                                                                         |
| Unit cell dimensions (in Å and °)                      | $a = 11.770(1)$ , $\alpha = 90$<br>$b = 23.106(1)$ , $\beta = 90.12(5)$<br>$c = 16.200(1)$ , $\gamma = 90$ |
| Volume (Å <sup>3</sup> )                               | 4406.0(5)                                                                                                  |
| Z                                                      | 4                                                                                                          |
| Density (mg/m <sup>3</sup> , calculated)               | 1.513                                                                                                      |
| F(000)                                                 | 2076                                                                                                       |
| Crystal size (mm)                                      | 0.22 x 0.23 x 0.06                                                                                         |
| $\theta$ range for data collection–rotation method (°) | 360                                                                                                        |
| Index ranges                                           | $0 < h < 12$ ; $0 < k < 26$ ; $-18 < l < +18$                                                              |
| No of reflections collected                            | 11911                                                                                                      |
| No of independent reflections                          | 6231                                                                                                       |
| Refinement method                                      | full-matrix least-squares on F <sup>2</sup>                                                                |
| Data / restraints / parameters                         | 5631 / 0 / 526                                                                                             |
| Goodness-of-fit on F <sup>2</sup>                      | 1.015                                                                                                      |
| Final R indexes [I>2 $\sigma$ (I)]                     | R1=0.0623, wR2=0.1715                                                                                      |
| R indexes (all data)                                   | R1= 0.0637, wR2=0.1733                                                                                     |
| Largest diff. peak and hole (eÅ <sup>-3</sup> )        | +0.39 / -0.44                                                                                              |
